# Supplementary material for: Near-Infrared Fluorescent Imaging for Monitoring of Treatment Response in Endometrial Carcinoma Patient-Derived Xenograft Models
Source: MDPI journal article supplement (doi:10.3390/cancers12020370), 2020-02-06
Supplement: s1 [file s1]

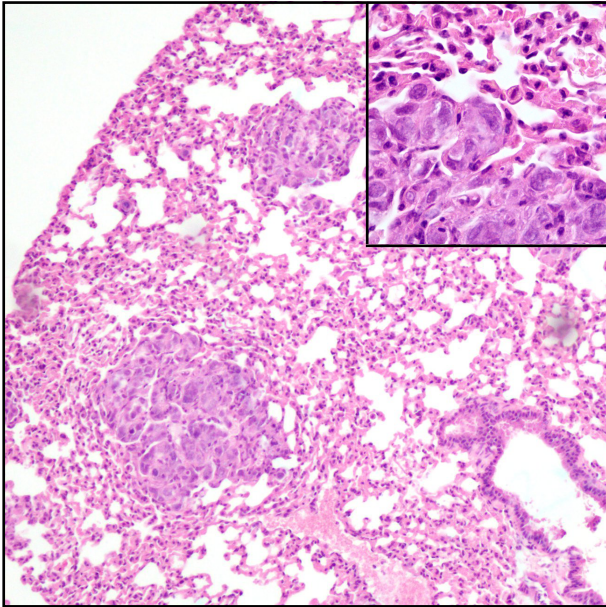

**Figure S1. Lung metastases in Hec1Bluc+ cell line model**  
Presence of lung metastases were confirmed by histology in a mouse orthotopically implanted with Hec1Bluc+ cells. The margin of a metastatic lesion is magnified (x 4 compared to main image) in the upper right corner (insert).
