# Supplementary material for: Near-Infrared Fluorescent Imaging for Monitoring of Treatment Response in Endometrial Carcinoma Patient-Derived Xenograft Models
Source: MDPI journal article supplement (doi:10.3390/cancers12020370), 2020-02-06
Supplement: s1 [file s1]

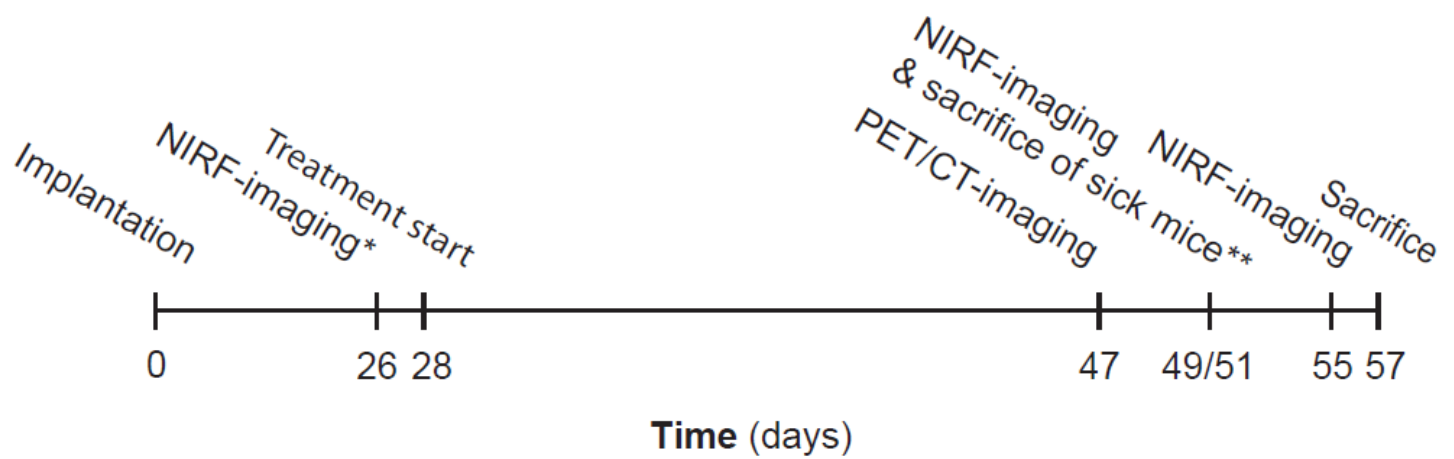

**Figure S3. Timeline demonstrating important events in the PDX model paclitaxel/trastuzumab treatment study.**

\*After mice were randomized into treatment groups

\*\*5 mice were euthanized due to clinical signs of disease, and underwent NIRF imaging immediately prior to sacrifice.

Abbreviations: Near infrared fluorescence (NIRF), Patient-derived xenograft (PDX), Positron emission tomography/computed tomography (PET/CT)
