# Supplementary material for: Near-Infrared Fluorescent Imaging for Monitoring of Treatment Response in Endometrial Carcinoma Patient-Derived Xenograft Models
Source: Cancers (Basel). 2020 Feb 6;12(2):370. doi: 10.3390/cancers12020370 (PMC7072497; doi:10.3390/cancers12020370)
Supplement: Supplementary file 1 [file cancers-12-00370-s001.zip]

Archive with 6 entries (6 files):
- Figure S1.pdf
- Figure S2.pdf
- Figure S3.pdf
- Table S1.docx
- Table S2.docx
- Table S3.docx
