# Supplementary figures and images for: Near-Infrared Fluorescent Imaging for Monitoring of Treatment Response in Endometrial Carcinoma Patient-Derived Xenograft Models
Source: MDPI journal article supplement (doi:10.3390/cancers12020370), 2020-02-06

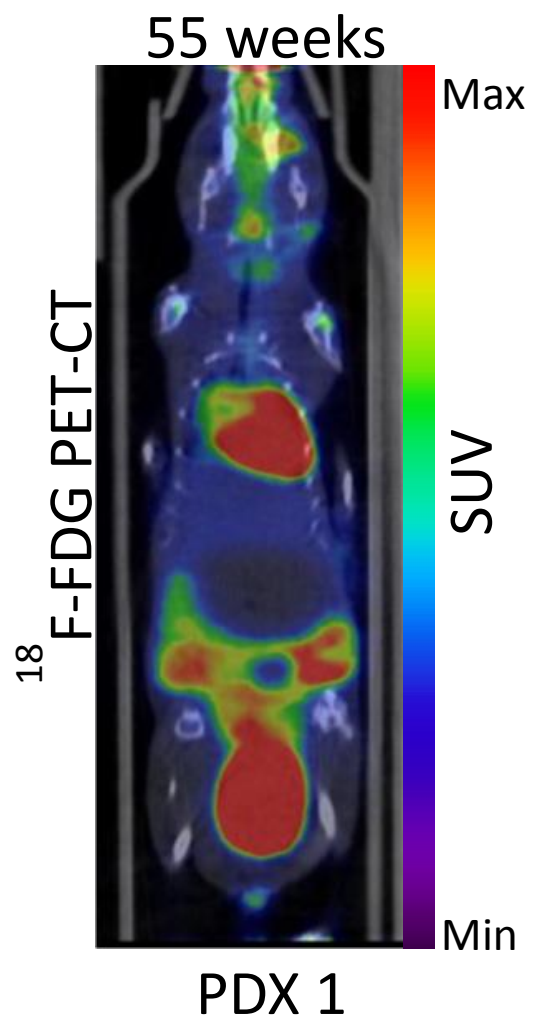

**Figure S2.** Uncropped  $^{18}\text{F}$ -FDG PET-CT image of PDX 1 55 weeks post implantation.

Supplement: s1 [file s1]
